# Supplementary material for: Peripherally, non-peripherally and axially pyrazoline-fused phthalocyanines: synthesis, aggregation behaviour, fluorescence, singlet oxygen generation, and photodegradation studies
Source: Royal Society of Chemistry journal article supplement (doi:10.1039/d3nj00355h), 2023-01-01
Supplement: d3nj00355h1.pdf [file d3nj00355h1.pdf]

## SUPPLEMENTARY INFORMATION

### **Peripherally, non-peripherally and axially pyrazoline-fused phthalocyanines: Synthesis, aggregation behaviour and fluorescence, singlet oxygen generation and photodegradation studies**

Halise Yalazan<sup>a</sup>, Halit Kantekin<sup>a,\*</sup>, Mahmut Durmuş<sup>b</sup>

<sup>a</sup>*Karadeniz Technical University, Department of Chemistry, Faculty of Sciences, Trabzon, Türkiye*

<sup>b</sup>*Gebze Technical University, Department of Chemistry, Gebze, 41400, Kocaeli, Türkiye*

\* Author for correspondence: Dr. Halit KANTEKİN, Department of Chemistry, Karadeniz Technical University, 61080 Trabzon, Turkey Tel: 00 90 462 377 25 89 Fax: 00 90 462 325 31 96 E-mail: halit@ktu.edu.tr

## 1.1. Materials and Equipments

All used chemicals were of reagent grade quality. 1,3-diphenylisobenzofuran (DPBF) and metal salts were purchased from Fluka or Merck and used as received. The used solvents and metal salts were purchased from Merck and Sigma Aldrich used as received.

All reactions were carried out under dry and oxygen free nitrogen atmosphere using Schlenk system. Infrared spectra were recorded on a Perkin Elmer 1600 FT-IR Spectrophotometer.  $^1\text{H}$  NMR and  $^{13}\text{C}$  NMR spectra were recorded on a Bruker Ascent 400 Mhz NMR spectrometer  $\text{CDCl}_3$ ,  $\text{DMSO}-d_6$  and chemical shifts were reported ( $\delta$ ) relative to  $\text{Me}_4\text{Si}$  (tetramethylsilane) as internal standard. Mass spectra were measured on a MALDI-TOF spectrometer. Optical spectra in the UV-Vis region were recorded with a Perkin Elmer Lambda 25 spectrophotometer and a Shimadzu 2101 UV/vis spectrophotometer. Melting points were measured by an Electrothermal apparatus.

Photo-irradiations were done using a General Electric quartz line lamp (300W). A 600 nm glass cut off filter (Schott) and a water filter were used to filter off ultraviolet and infrared radiations respectively. An interference filter (Intor, 670 or 700 nm with a band width of 40 nm) was additionally placed in the light path before the sample. Light intensities were measured with a POWER MAX5100 (Molelectron detector incorporated) power meter.

## 2. Photophysical and Photochemical Parameters

### 2.1. Photophysical parameters

#### 2.1.1. Fluorescence quantum yields and lifetimes

Fluorescence quantum yields ( $\Phi_F$ ) of newly synthesized phthalocyanines were determined by the comparative method using equation 1 [1-2],

$$\phi_F = \phi_{F(Std)} \frac{F}{F_{Std}} \cdot \frac{A_{Std}}{A} \quad (1)$$

where  $F$  and  $F_{Std}$  are the areas under the fluorescence emission curves of the samples and the standard, respectively.  $A$  and  $A_{Std}$  are the respective absorbances of the samples and standard at the excitation wavelengths, respectively. Unsubstituted ZnPc (in DMSO) ( $\Phi_F = 0.20$ ) [3] was employed as the standard. The absorbance of the solutions at the excitation wavelength ranged between 0.04 and 0.05.

Fluorescence lifetimes were measured using a time correlated single photon counting setup (TCSPc). The natural radiative lifetimes ( $\tau_0$ ) were evaluated using equation 2.

$$\tau_0 = \frac{\tau_f}{\phi_f}$$

## 2.2. Photochemical parameters

### 2.2.1. Singlet oxygen quantum yields

Singlet oxygen quantum yield ( $\Phi_\Delta$ ) determinations were carried out using the experimental set-up described in literature [4-6]. Typically, a 3 mL portion of the respective novel phthalocyanines solutions ( $C: 1 \times 10^{-5} M$ ) containing the singlet oxygen quencher were irradiated in the Q band region with the photo-irradiation set-up described in Refs. [4-6]. Singlet oxygen quantum yields ( $\Phi_\Delta$ ) were determined in air using the relative method with unsubstituted ZnPc as reference in DMSO. DPBF was used as a chemical quencher for singlet oxygen determination and equation 3 was employed for the calculations:

$$\phi_\Delta = \phi_\Delta^{Std} \frac{R \cdot I_{abs}^{Std}}{R^{Std} \cdot I_{abs}} \quad (3)$$

where  $\phi_\Delta^{Std}$  is the singlet oxygen quantum yield for the standard ZnPc ( $\phi_\Delta^{Std} = 0.67$  in DMSO) [7].  $R$  and  $R_{Std}$  are the DPBF photobleaching rates in the presence of the respective samples and standard, respectively.  $I_{abs}$  and  $I_{abs}^{Std}$  are the rates of light absorption by the samples and standard, respectively. To avoid chain reactions induced by DPBF in the presence of singlet oxygen, the concentration of quencher was lowered to  $\sim 3 \times 10^{-5} \text{ mol dm}^{-3}$  [8]. Solutions of sensitizer containing DPBF were prepared in the dark and irradiated in the Q band region using the set-up described in literature [4-6]. A decrease at 417 nm was monitored for the absorption of DPBF. The light intensity  $6.60 \times 10^{15} \text{ photons s}^{-1} \text{ cm}^{-2}$  was used for  $\Phi_\Delta$  determinations.

### 2.2.2. Photodegradation quantum yields

Photodegradation quantum yield ( $\Phi_d$ ) determination of studied novel phthalocyanines was carried out using the experimental set-up described in literature [4-6]. Photodegradation quantum yields of complexes were determined using equation 4,

$$\phi_d = \frac{(C_0 - C_t) \cdot V \cdot N_A}{I_{abs} \cdot S \cdot t} \quad (4)$$

where  $C_0$  and  $C_t$  are the concentrations of the samples before and after irradiation, respectively,  $V$  is the reaction volume,  $N_A$  is the Avogadro's constant,  $S$  is the irradiated cell area and  $t$  is the irradiation time,  $I_{abs}$  is the overlap integral of the radiation source light intensity and the absorption of the samples.

## References

- [1] Suzanne Fery-Forgues and Dominique Lavabre. Are fluorescence Quantum Yields so tricky to measure? A Demonstration using familiar stationery products. *J. Chem. Educ.* 76 (1999) p. 1260.
- [2] David Mare, Tebello Nyokong, Klaus Suhling, David Phillips. Effects of axial ligands on the photophysical properties of silicon octaphenoxypthalocyanine. *Journal of Porphyrins and Phthalocyanines*. 6 (2002) 373-376.
- [3] Abimbola Ogunsipe, Ji-Yao Chen and Tebello Nyokong. Photophysical and photochemical studies of zinc(II)phthalocyanine derivatives-effects of substituents and solvents. *New journal of chemistry*. 28 (2004) 822-827.
- [4] J. H. Brannon and Douglas Madge. Picosecond and Laser Photophysics, Group 3A Phthalocyanines. *Journal of the American Chemical Society*. 102 (1980) 62-65.
- [5] Abimbola Ogunsipe and Tebello Nyokong. Photophysical and photochemical studies of sulphonated non-transition metal phthalocyanines in aqueous and non-aqueous media. *Journal of Photochemistry and Photobiology A: Chemistry*. 173 (2005) 211-220.
- [6] Itumeleng Seotsanyana-Mokhosi, Nina Kuznetsova, Tebello Nyokong. Photochemical studies of tetra-2,3-pyridinoporphyrazines. *Journal of Photochemistry and Photobiology A*. 140 (2001) 215-222.

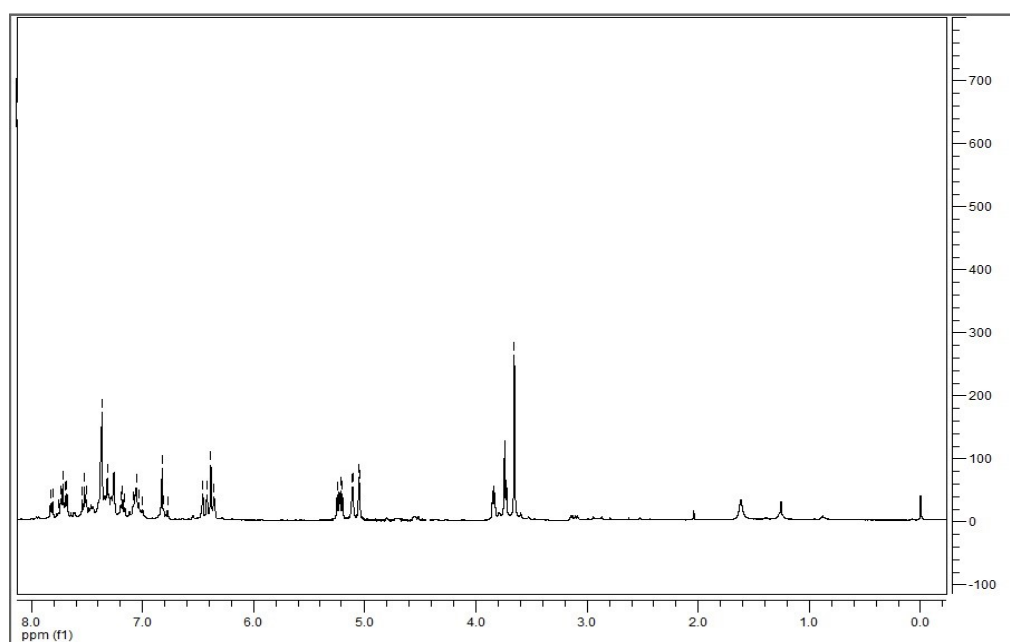

**Fig. S1:**  $^1\text{H}$  NMR spectrum of HY-CN<sup>p</sup>

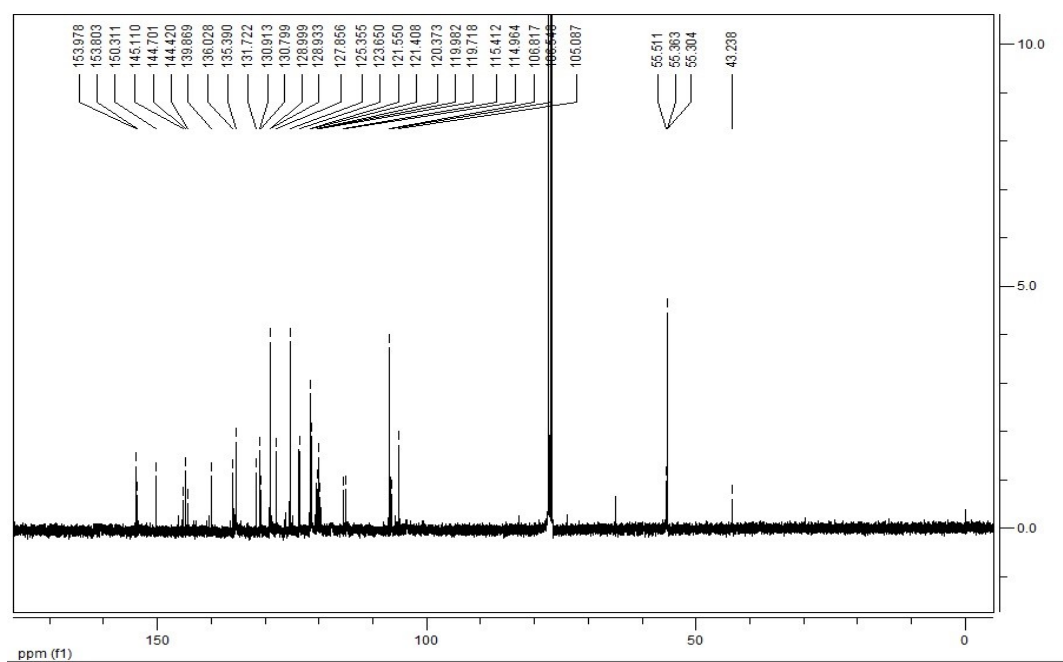

**Fig. S2:**  $^{13}\text{C}$  NMR spectrum of HY-CN<sup>p</sup>
